# Supplementary material for: Effects of tuning the structural symmetry of cobalt porphyrin on electrocatalytic oxygen reduction reactions
Source: Royal Society of Chemistry journal article supplement (doi:10.1039/d3dt02233a), 2023-01-01
Supplement: d3dt02233a1.pdf [file d3dt02233a1.pdf]

## Supplementary Information

# Effects of structural symmetry in cobalt porphyrin-electrocatalytic oxygen reduction reactions

*Yuqin Wei*<sup>a</sup>, *Yongdi Liang*<sup>a</sup>, *Qijie Wu*<sup>a</sup>, *Zhaoli Xue*<sup>a</sup>, *Lei Feng*<sup>b</sup>, *Jianming Zhang*<sup>a</sup>, *Long Zhao*<sup>a, \*</sup>

<sup>a</sup> School of Chemistry and Chemical Engineering, Jiangsu University, Zhenjiang, 212013, PR China.

<sup>b</sup> Monash Suzhou Research Institute, Monash University, Suzhou Industrial Park, Suzhou 215000, PR China

Corresponding author: [longzhao@ujs.edu.cn](mailto:longzhao@ujs.edu.cn)

## SI 1. Synthesis

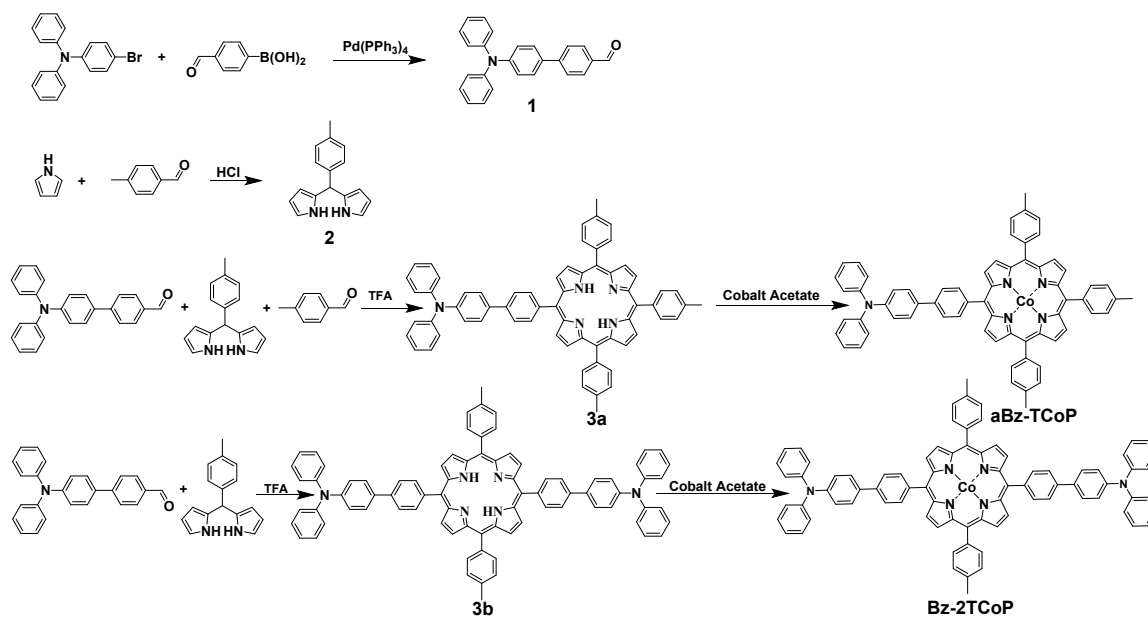

**Figure S1.** Synthetic routes for the investigated **aBz-TCoP** and **Bz-2TCoP**.

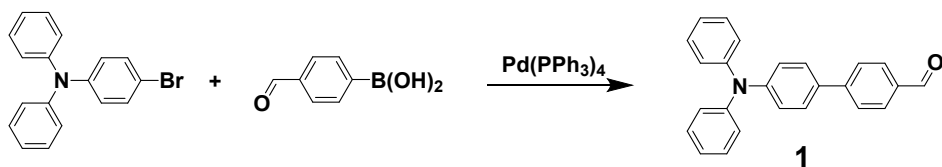

**4'-((diphenylamino)-[1,1'-biphenyl]-4-carbaldehyde (Compound 1):** 2 mmol 4-bromo-N, N-diphenylaniline, 2.2 mmol 4-formylphenylboronic acid, 0.1 mol tetrakis (triphenylphosphine) palladium, 10 mL THF, and 10 mL 0.4 M K<sub>2</sub>CO<sub>3</sub> were mixed in a flask and the mixture was stirred for 12 h under dark and nitrogen atmosphere. A yellow solid was obtained by vacuum distillation and silica gel column chromatography (CH<sub>2</sub>Cl<sub>2</sub>: petroleum ether = 1:1). Yield: 91 %.

<sup>1</sup>H NMR (400 MHz, Chloroform-*d*) δ 10.03 (s, 1H), 7.95 – 7.91 (m, 2H), 7.75 – 7.71 (m, 2H), 7.55 – 7.50 (m, 2H), 7.29 (dd, J = 8.5, 7.3 Hz, 4H), 7.17 – 7.13 (m, 6H), 7.08 (td, J = 7.3, 1.2 Hz, 2H).

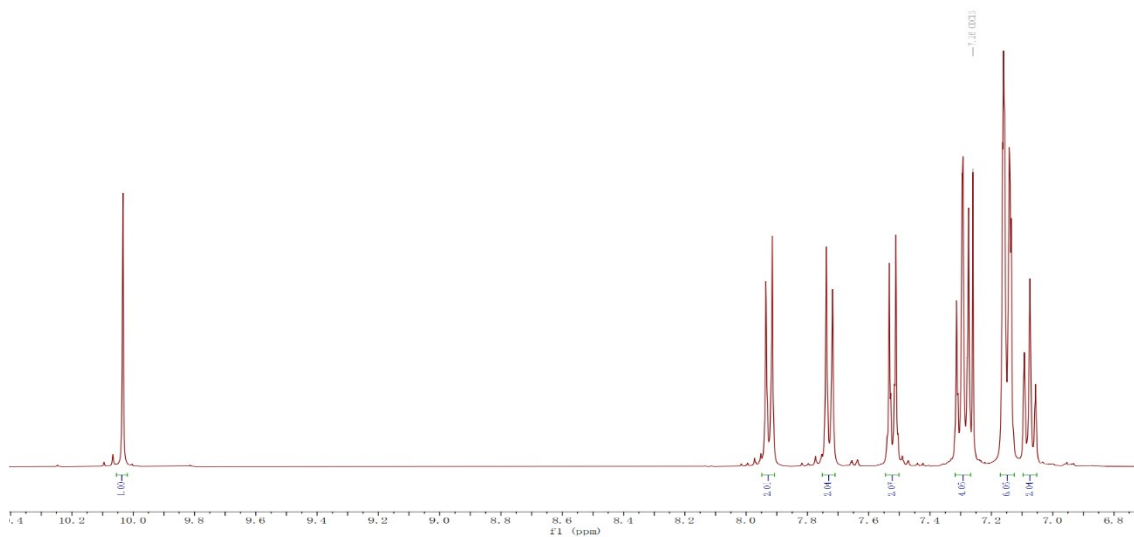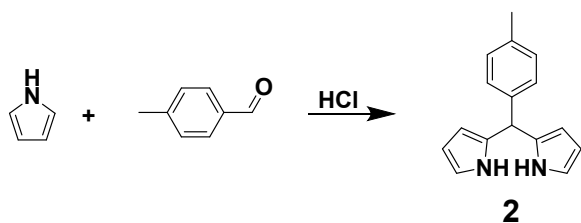

**2,2'-(phenylmethylene)bis(1H-pyrrole) (Compound 2)** was prepared following the method described in the literature [1].

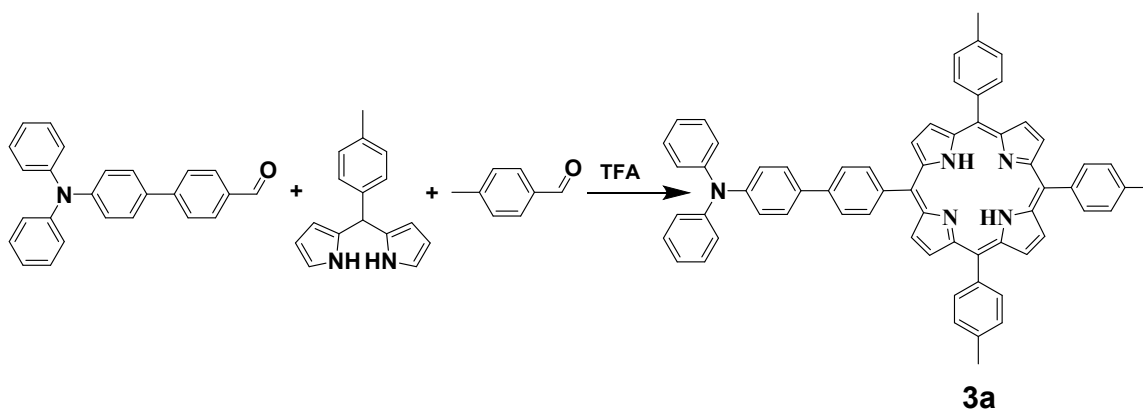

**N, N-diphenyl-4'-((5,15,20-tri-p-tolylporphyrin-10-yl)-[1,1'-biphenyl]-4-amine (Compound 3a):** 1 mmol **Compound 1** (349.43 mg), 2 mmol **Compound 2** (472.26 mg) and 1 mmol *p*-methyl benzaldehyde (120.15 mg) were added to 100 mL anhydrous  $\text{CH}_2\text{Cl}_2$ . The mixture was stirred in a dark

and nitrogen atmosphere for 5 min, and then 2.42 mmol TFA (0.18 mL) was slowly added to initiate the reaction. After stirring at room temperature for 1 h, 1.5 mmol tetra-chloro-benzoquinone (393.3 mg) was added and stirred under the same condition. The reaction was monitored by thin-layer chromatography. Then 2.42 mmol TEA (0.337 mL) was added to neutralize the reaction. The crude product was purified by silica gel column chromatography (CH<sub>2</sub>Cl<sub>2</sub>: petroleum ether = 1:2) to obtain a purple solid. Yield: 8.6%.

<sup>1</sup>H NMR (400 MHz, Chloroform-*d*) δ 8.92 (d, *J* = 4.8 Hz, 2H), 8.88 (d, *J* = 8.2 Hz, 6H), 8.28 – 8.24 (m, 2H), 8.11 (dd, *J* = 7.7, 1.3 Hz, 6H), 7.97 – 7.93 (m, 2H), 7.82 – 7.79 (m, 2H), 7.56 (d, *J* = 7.8 Hz, 6H), 7.35 (d, *J* = 7.2 Hz, 2H), 7.32 (d, *J* = 2.0 Hz, 2H), 7.31 – 7.28 (m, 2H), 7.25 – 7.21 (m, 4H), 7.12 – 7.06 (m, 2H), 2.71 (s, 9H), -2.73 (s, 2H).

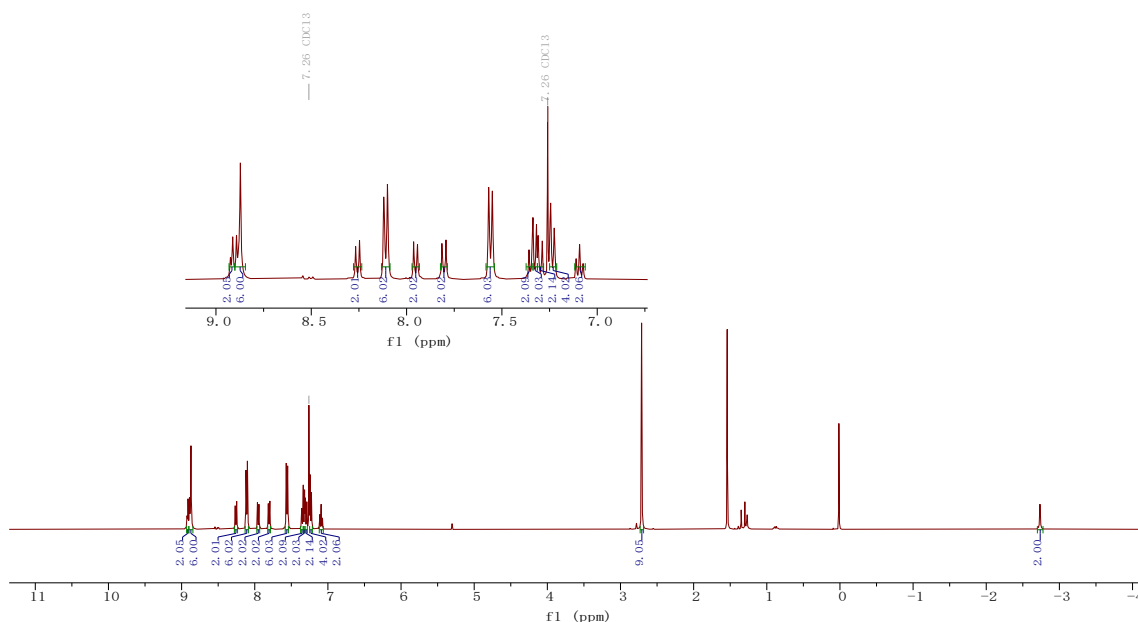

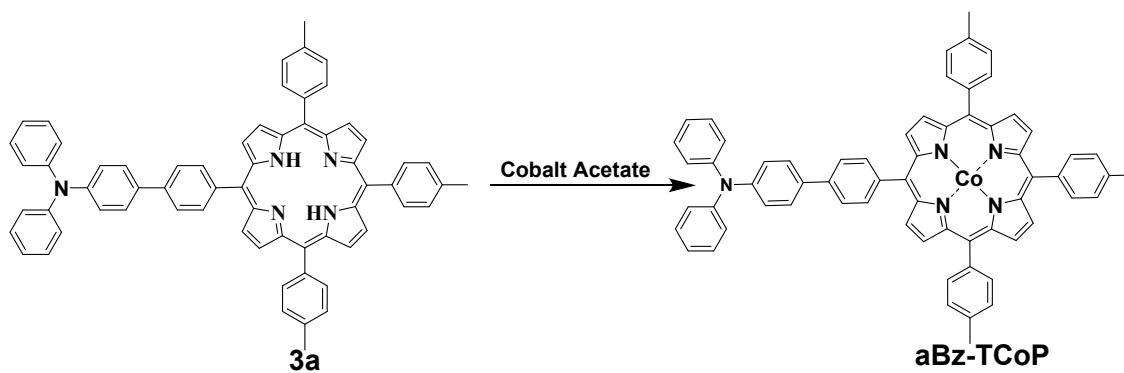

**N, N-diphenyl-4'-(5,15,20-tri-p-tolylporphyrin-10-yl)-[1,1'-biphenyl]-4-amine cobalt (II) (aBz-TCoP)** : 0.05 mmol **Compound 3a** (45.01 mg) was added to a double-necked bottle, and dissolved in the minimum volume of  $\text{CHCl}_3$ . The solution was refluxed at 68 °C for 15 min in a dark nitrogen atmosphere. Then 0.25 mmol cobalt acetate tetrahydrate (62 mg) in methanol was added to the bottle with a syringe. The mixture was continued to reflux, and the reaction was monitored by TLC. The organic phase was collected by extraction with  $\text{CH}_2\text{Cl}_2$  and water, and was dried with anhydrous sodium sulfate and purified by silica gel column chromatography ( $\text{CH}_2\text{Cl}_2$ : petroleum ether = 1: 2) to obtain a dark red solid. Yield: 91%.

HR-MS (m/z): requires for:  $\text{C}_{56}\text{H}_{47}\text{CoN}_5$  956.3163, found  $[\text{M}]^+ = 956.3130$

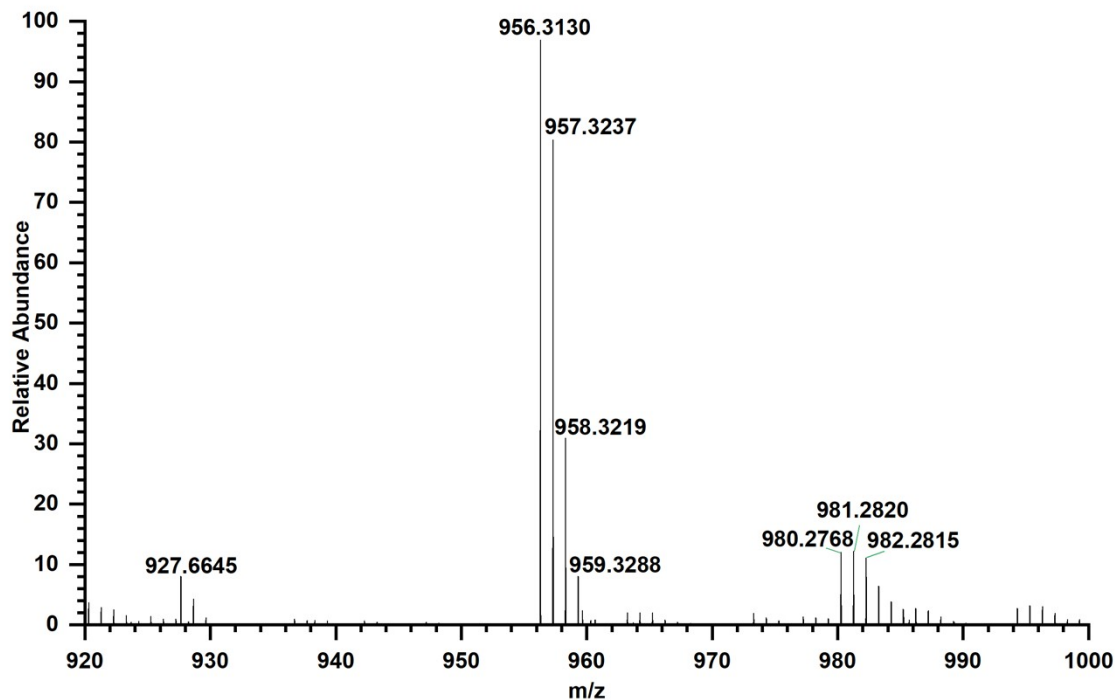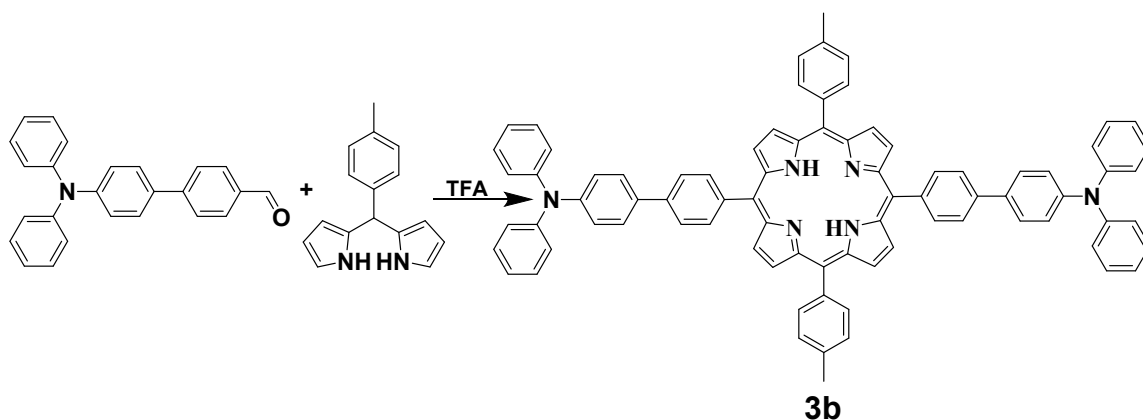

**4',4'''-(5,15-di-p-tolylporphyrin-10,20-diyl) bis (N, N-diphenyl-[1,1'-biphenyl]-4-amine)**

**(Compound 3b):** The synthetic route for **Compound 3b** followed the similar procedure for **Compound 3a** except changing the initial ratio of **Compound 1** to **Compound 2** from 1:2 to 1:1. A purple solid was gained at yield of 13.4%.

$^1\text{H NMR}$  (400 MHz, Chloroform-*d*)  $\delta$  8.92 (ddd,  $J = 12.9, 8.1, 3.8$  Hz, 8H), 8.25 (dd,  $J = 8.0, 2.3$  Hz, 4H), 8.12 (d,  $J = 7.2$  Hz, 4H), 7.93 (dd,  $J = 8.2, 2.1$  Hz, 4H), 7.79 (d,  $J = 8.2$  Hz, 4H), 7.56 (d,  $J =$

7.6 Hz, 4H), 7.35 (d,  $J = 7.8$  Hz, 4H), 7.32 (s, 4H), 7.30 (d,  $J = 8.3$  Hz, 4H), 7.24 (d,  $J = 7.8$  Hz, 8H), 7.10 (t,  $J = 7.3$  Hz, 4H), 2.71 (s, 6H), -2.69 (s, 2H).

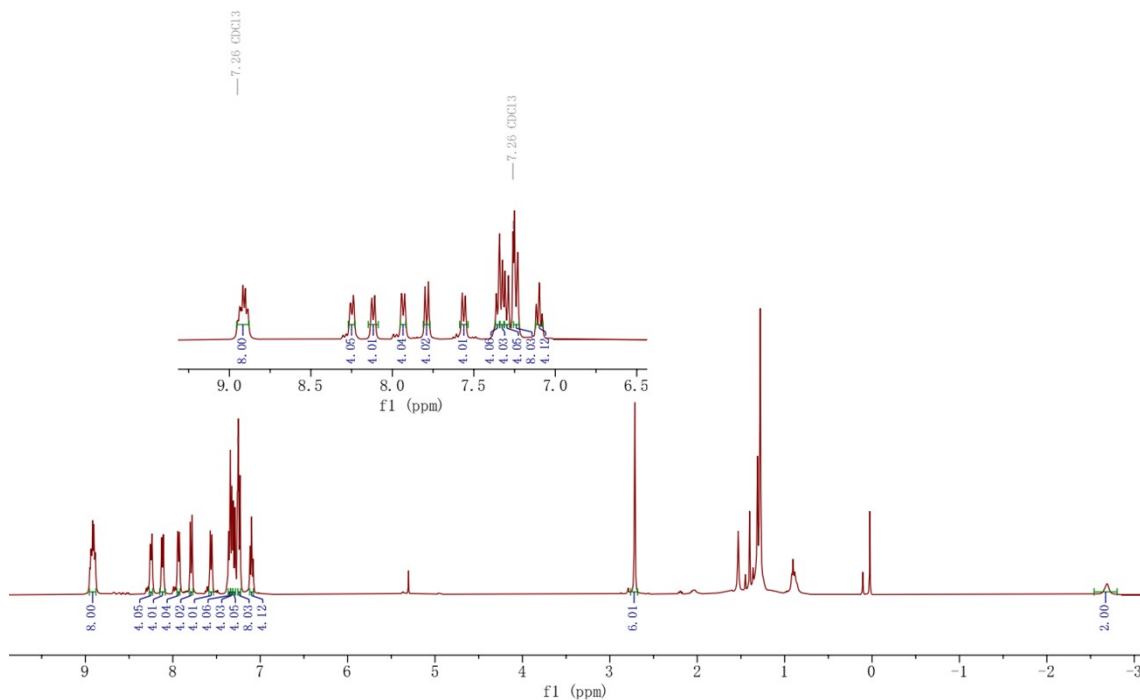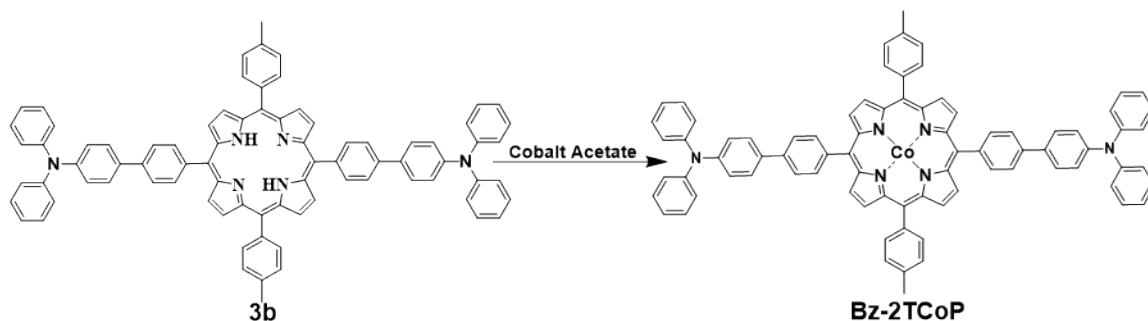

**4',4'''-(5,15-di-p-tolylporphyrin-10,20-diyl) bis (N, N-diphenyl-[1,1'-biphenyl]-4-amine) cobalt (II) (Bz-2TCoP):** The synthetic route for **Bz-2TCoP** followed the similar procedure for **aBz-TCoP** except changing the precursor **Compound 3a** to **Compound 3b**. A dark red solid was gained at yield of 89%.

HR-MS ( $m/z$ ): requires for:  $C_{80}H_{52}CoN_6$  1085.4005, found  $[M]^+ = 1085.4080$ .

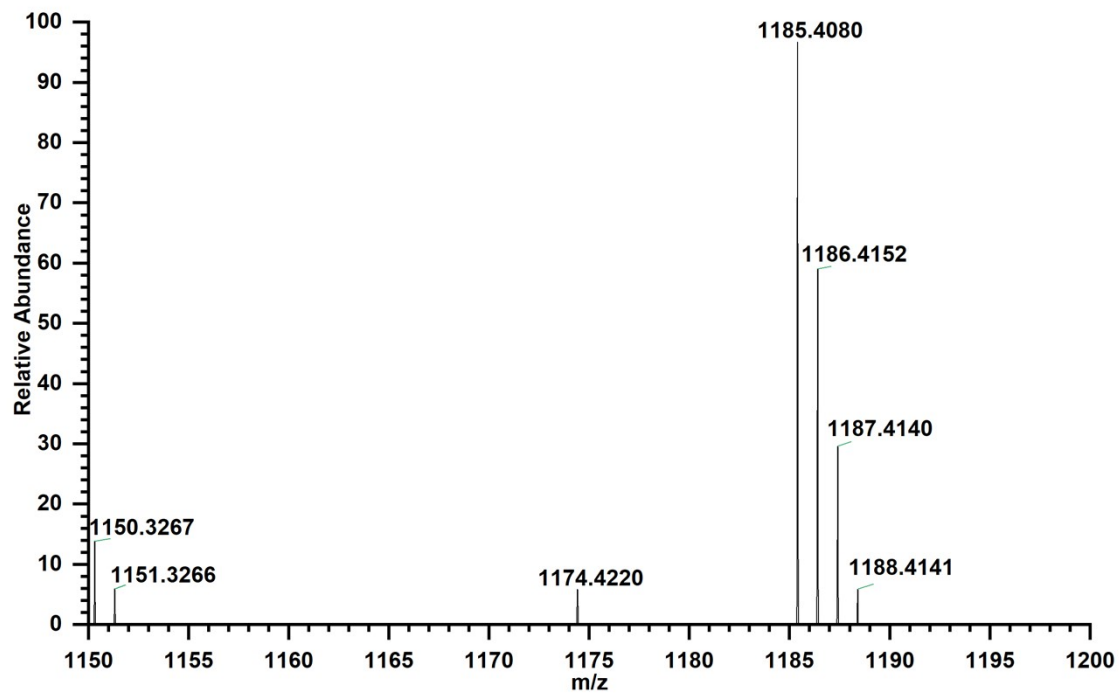



## SI 2. DFT results

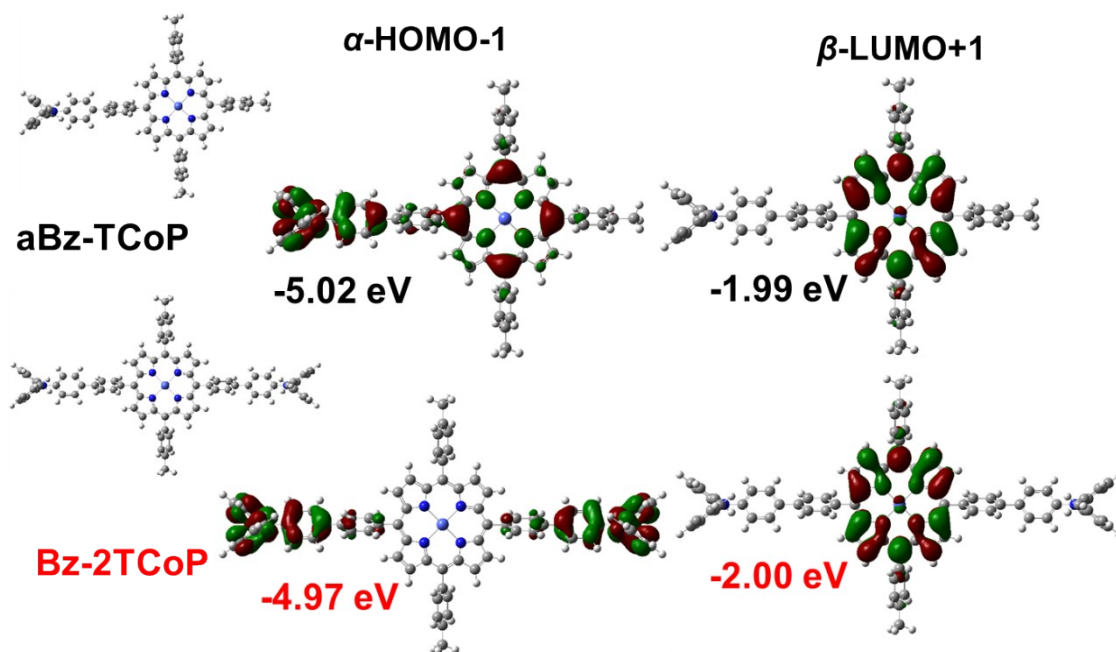

**Figure S2.** Optimized structures and DFT calculated higher energy molecular orbitals with energy levels of **aBz-TCoP** and **Bz-2TCoP**.

### SI 3. UV-vis absorption spectra

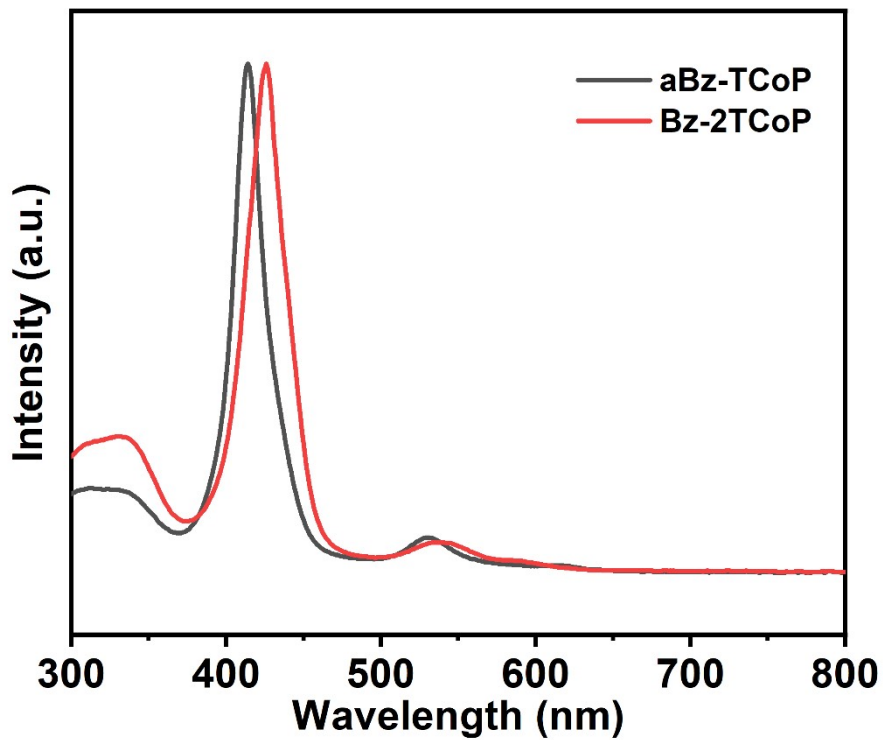

**Figure S3.** Normalized UV-vis absorption spectra of **aBz-TCoP** and **Bz-2TCoP** in DCM solution.

#### SI 4. IR spectra

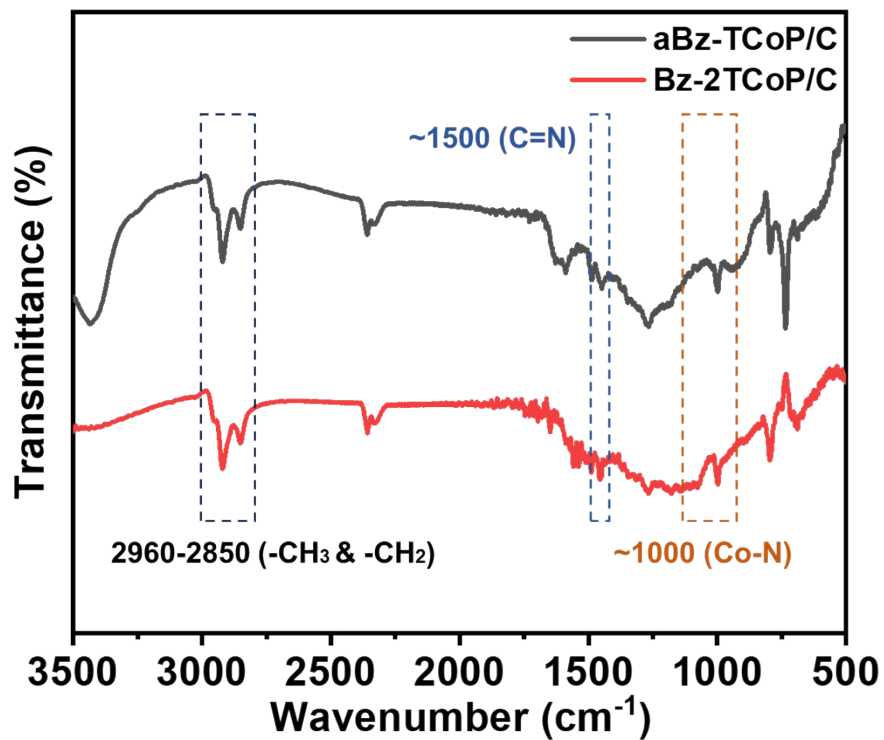

Figure S4. IR spectra of aBz-TCoP/C and Bz-2TCoP/C.

## SI 5. Raman spectra

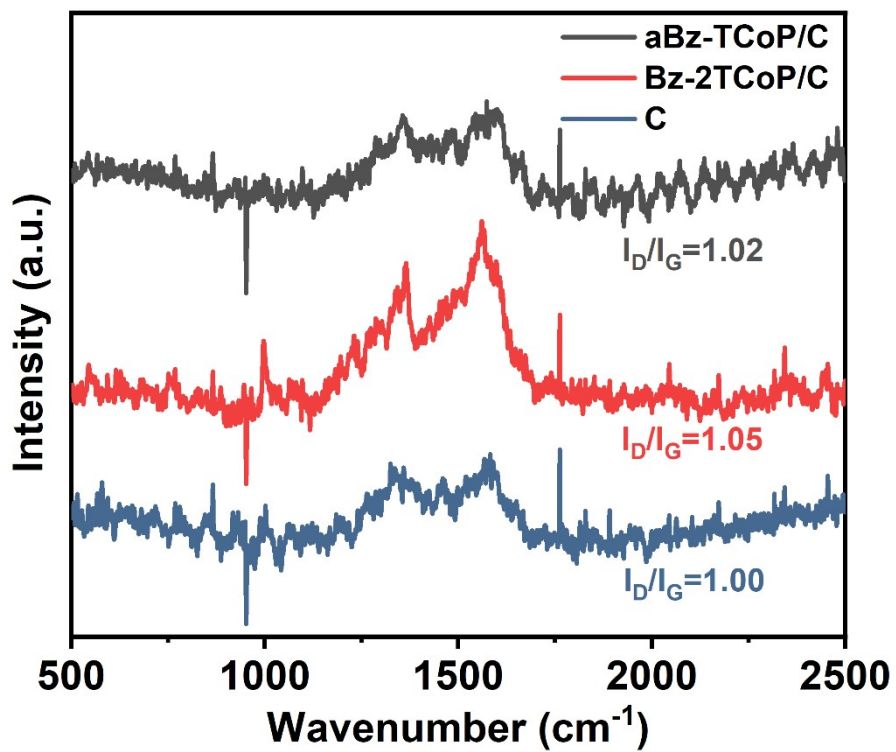

Figure S5. Raman spectra of aBz-TCoP/C, Bz-2TCoP/C and Carbon black (C).

SI 6. XPS

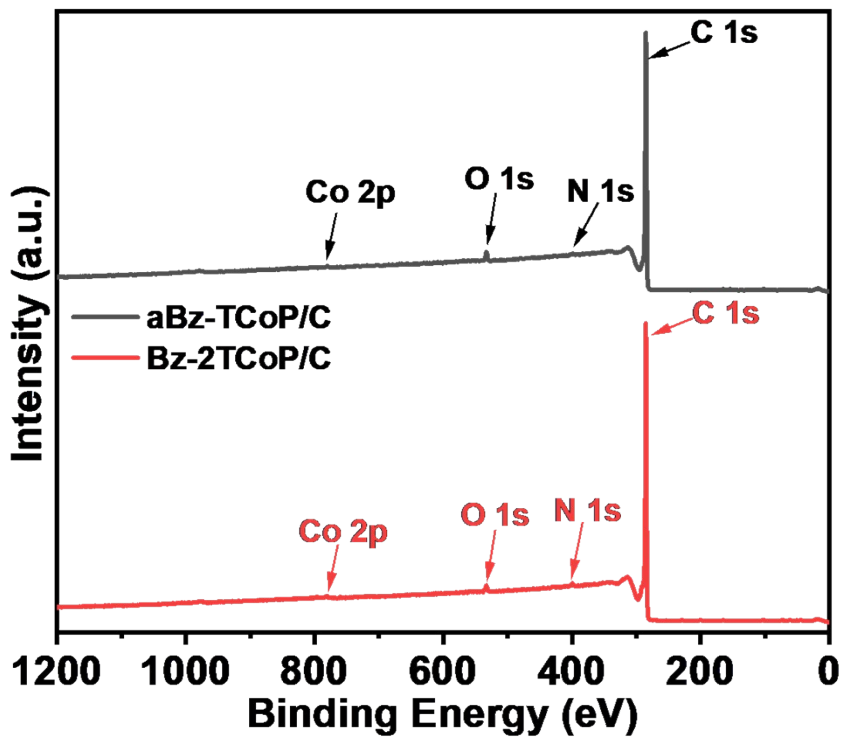

Figure S6. XPS survey spectra of aBz-TCoP/C and Bz-2TCoP/C.

## SI 7. Electrochemical data of aBz-TCoP/C and Bz-2TCoP/C

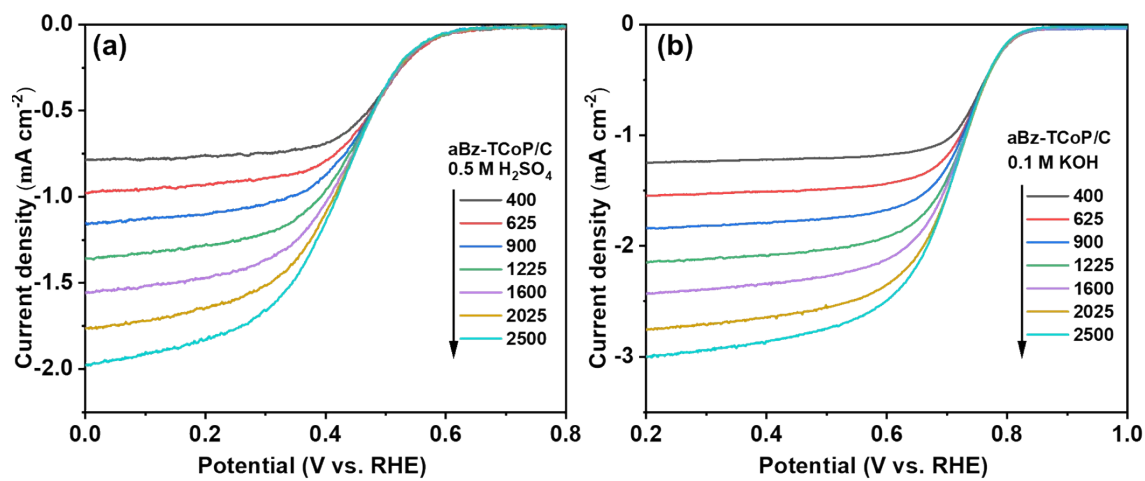

**Figure S7.** LSV plots of **aBz-TCoP/C** in O<sub>2</sub>-saturated (a) 0.5 M H<sub>2</sub>SO<sub>4</sub> and (b) 0.1 M KOH at various of rotation speeds. Scan rate: 10 mV s<sup>-1</sup>.

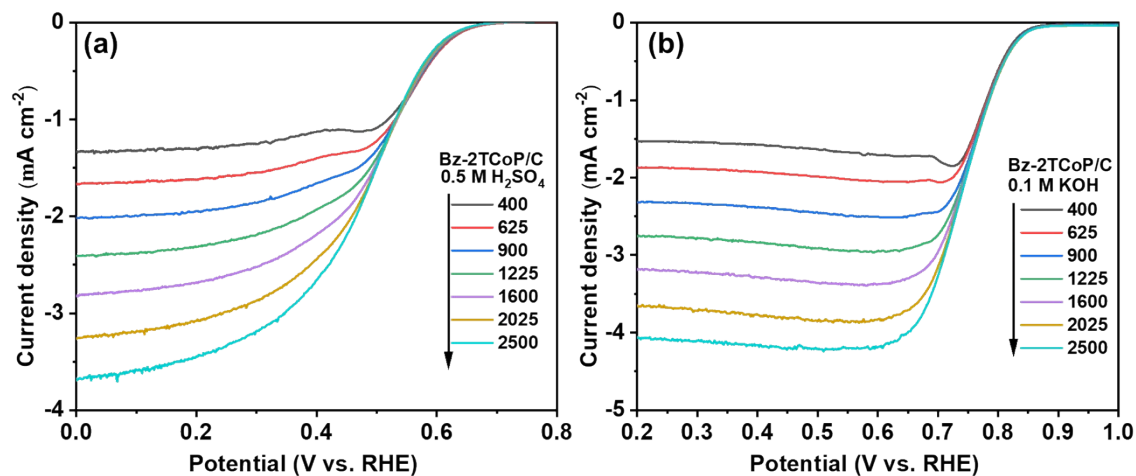

**Figure S8.** LSV plots of **Bz-2TCoP/C** in O<sub>2</sub>-saturated (a) 0.5 M H<sub>2</sub>SO<sub>4</sub> and (b) 0.1 M KOH at various of rotation speeds. Scan rate: 10 mV s<sup>-1</sup>.

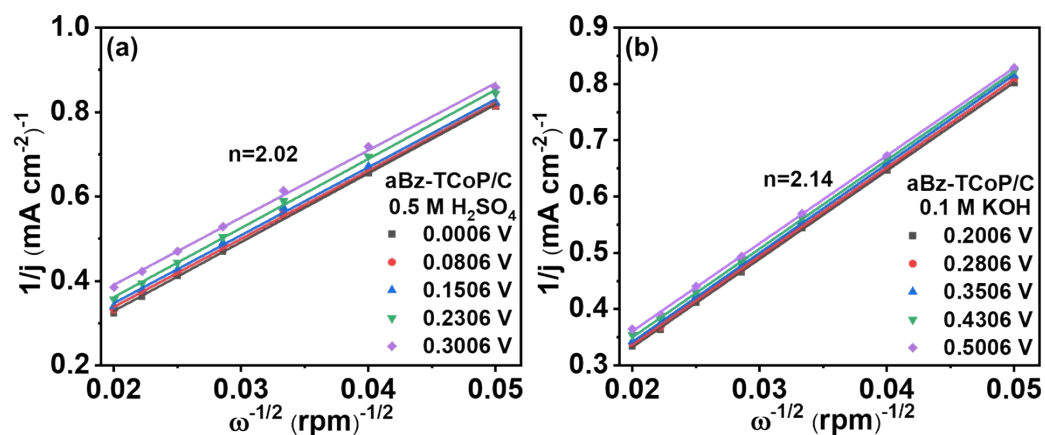

**Figure S9.** K-L plots of aBz-TCoP/C in O<sub>2</sub>-saturated (a) 0.5 M H<sub>2</sub>SO<sub>4</sub> and (b) 0.1 M KOH at various of rotation speeds.

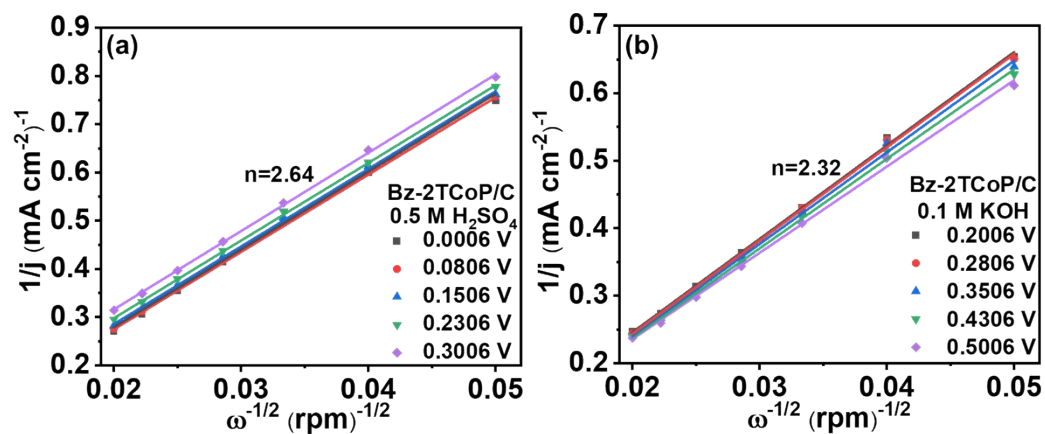

**Figure S10.** K-L plots of Bz-2TCoP/C in O<sub>2</sub>-saturated (a) 0.5 M H<sub>2</sub>SO<sub>4</sub> and (b) 0.1 M KOH at various of rotation speeds.

### SI 8. Tafel diagrams of aBz-TCoP/C and Bz-2TCoP/C

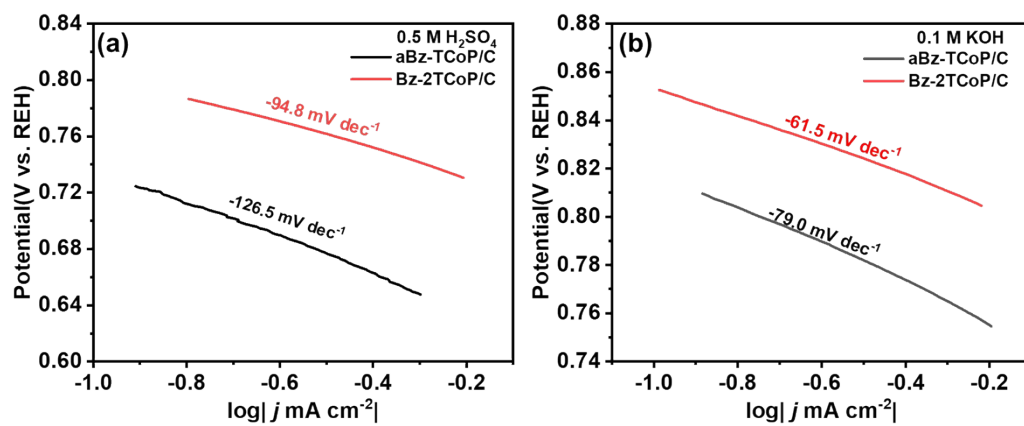

**Figure S11.** The corresponding Tafel diagrams of **aBz-TCoP/C** and **Bz-2TCoP/C** in O<sub>2</sub>-saturated (a) 0.5 M H<sub>2</sub>SO<sub>4</sub> and (b) 0.1 M KOH at 1600 rpm.



### SI 9. Data of different metal loadings in aBz-TCoP/C

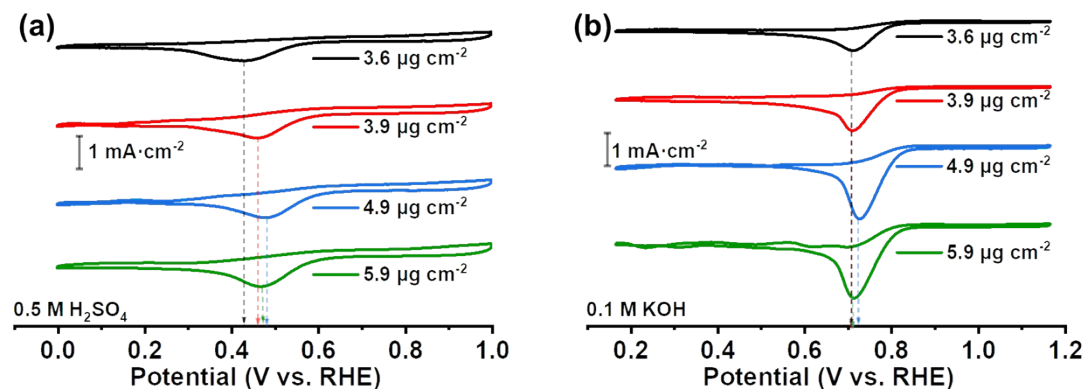

**Figure S12.** CV curves of aBz-TCoP/C with different cobalt loadings in  $\text{O}_2$ -saturated (a) 0.5 M  $\text{H}_2\text{SO}_4$  and (b) 0.1 M KOH. Scan rate:  $50 \text{ mV s}^{-1}$ .

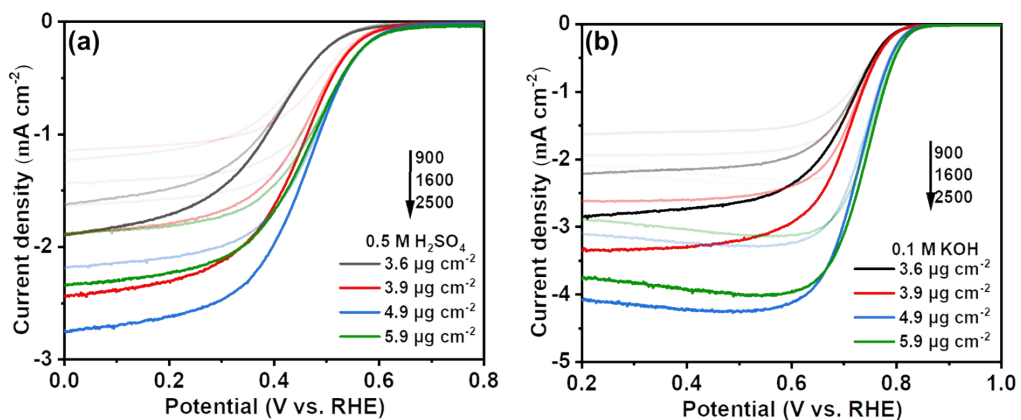

**Figure S13.** LSV plots of aBz-TCoP/C with different cobalt loadings in  $\text{O}_2$ -saturated (a) 0.5 M  $\text{H}_2\text{SO}_4$  and (b) 0.1 M KOH at different rotation speeds. Scan rate:  $10 \text{ mV s}^{-1}$ .

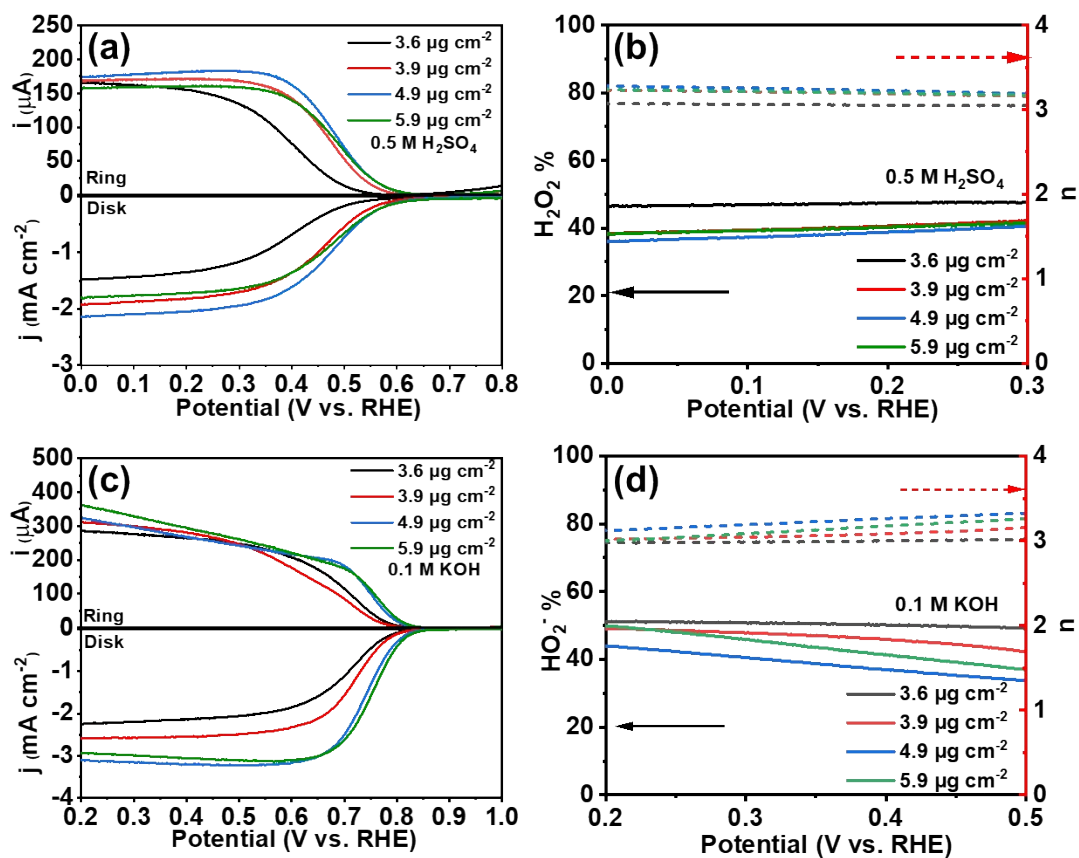

**Figure S14.** RRDE curves of aBz-TCoP/C with different cobalt loadings in  $\text{O}_2$ -saturated (a) 0.5 M  $\text{H}_2\text{SO}_4$  and (c) 0.1 M KOH, and the corresponding  $\text{H}_2\text{O}_2\%$  /  $\text{HO}_2\%$  (solid lines) and  $n$  (dotted lines) values of aBz-TCoP/C at the recorded potential range in (b) 0.5 M  $\text{H}_2\text{SO}_4$  and (d) 0.1 M KOH. Rotation speed: 1600 rpm. Scan rate: 10 mV s $^{-1}$ .

## SI 10. Comparison table of the cobalt porphyrin-catalytic ORR performance

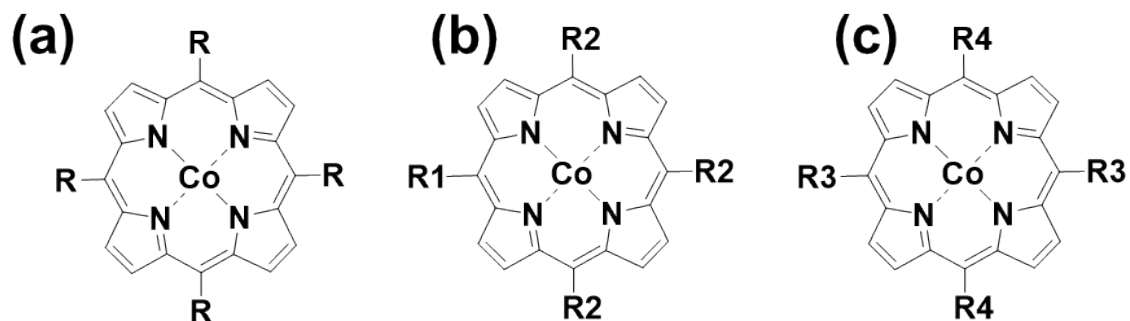

**Figure S15.** Template molecules for the comparison of ORR performance in Tables S1-3

**Table S1.** Summary of catalyst structure and ORR performance with Fig. S15a as the template molecules. All potentials are vs. RHE.

| Catalysts  | R structure                                                                         | $E_{\text{ORR}}^{\text{a}}$ (V) | $E_{1/2}^{\text{c}}$ (V) | $J_{\text{L}}^{\text{d}}$ ( $\text{mA cm}^{-2}$ ) | $n^{\text{e}}$ | Solution               | Reference |
|------------|-------------------------------------------------------------------------------------|---------------------------------|--------------------------|---------------------------------------------------|----------------|------------------------|-----------|
| 1@ZIF-67   | 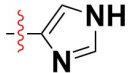 | -                               | 0.79                     | -                                                 | $\approx 3.7$  | 0.1 M KOH              | [2]       |
| (TPP)Co 1c |  | 0.15                            | 0.20                     | -                                                 | $\approx 2.4$  | 1.0M HClO <sub>4</sub> | [3]       |
| 1/CNTs     |  | -                               | 0.81                     | -5.46                                             |                | 0.1 M KOH              | [4]       |

**Table S2.** Summary of catalyst structure and ORR performance with Fig. S15b as the template molecules. All potentials are vs. RHE.

| Catalysts                          | R1 structure                                                                        | R2 structure                                                                        | $E_{\text{ORR}}^a$ (V) | $n^e$ | Solution                             | Reference |
|------------------------------------|-------------------------------------------------------------------------------------|-------------------------------------------------------------------------------------|------------------------|-------|--------------------------------------|-----------|
| aBz-TCoP/C                         | 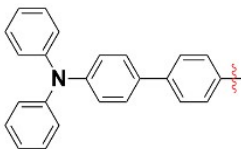   |    | 0.41                   | 3.2   | 0.5 M H <sub>2</sub> SO <sub>4</sub> | This work |
|                                    |                                                                                     |                                                                                     | 0.70                   | 3.0   | 0.1 M KOH                            |           |
| CoHPX-1                            |    |    | 0.44                   | ≈3.4  | 0.5 M H <sub>2</sub> SO <sub>4</sub> | [5]       |
| A-TPA-CoPor                        |   |   | 0.44                   | ≈3.6  | 0.5 M H <sub>2</sub> SO <sub>4</sub> | [6]       |
|                                    |                                                                                     |                                                                                     | -                      | ≈3.8  | pH=0                                 |           |
| CoTPPNMe <sub>3</sub> <sup>+</sup> |  |  | -                      | ≈3.5  | pH=4                                 | [7]       |
|                                    |                                                                                     |                                                                                     | -                      | ≈3.2  | pH=7                                 |           |

**Table S3.** Summary of catalyst structure and ORR performance with Fig. S15c as the template molecules. All potentials are vs. RHE.

| Catalysts       | R3 structure | R4 structure | $E_{1/2}^c$ (V) | $J_L^d$ (mA cm <sup>-2</sup> ) | $n^e$ | Solution                             | Reference        |
|-----------------|--------------|--------------|-----------------|--------------------------------|-------|--------------------------------------|------------------|
| Bz-2TCoP/C      |              |              | 0.52            | -2.82                          | 3.6   | 0.5 M H <sub>2</sub> SO <sub>4</sub> | <b>This work</b> |
|                 |              |              | 0.77            | -3.18                          | 3.5   | 0.1 M KOH                            |                  |
| XCP4@C          |              |              | 0.39            | -1.64                          | ≈2.5  | 0.5 M H <sub>2</sub> SO <sub>4</sub> | [8]              |
| BCP1/C          |              |              | 0.33            | -1.75                          | ≈3.0  | 0.5 M H <sub>2</sub> SO <sub>4</sub> | [9]              |
| BCP2/C          |              |              | 0.29            | -1.96                          | ≈2.3  | 0.5 M H <sub>2</sub> SO <sub>4</sub> | [9]              |
| s-TPA-CoP/XC    |              |              | 0.61            | -4.19                          | ≈3.1  | 0.1 M KOH                            | [10]             |
| CN-CoPor/C      |              |              | 0.48            | -2.52                          | ≈3.2  | 0.5 M H <sub>2</sub> SO <sub>4</sub> | [11]             |
|                 |              |              | 0.71            | -3.78                          | ≈3.4  | 0.1 M KOH                            |                  |
| TPA-BTD-CoPor/C |              |              | 0.47            | -3.78                          | ≈3.0  | 0.1 M KOH                            | [12]             |

## References

- [1] T. Rohand, E. Dolusic, T.H. Ngo, W. Maes, W. Dehaen, Efficient synthesis of aryldipyrromethanes in water and their application in the synthesis of corroles and dipyrromethenes, *ARKIVOC*, 2007 (2007) 307-324.
- [2] Z.Z. Liang, H.B. Guo, G.J. Zhou, K. Guo, B. Wang, H.T. Lei, W. Zhang, H.Q. Zheng, U.P. Apfel, R. Cao, Metal-Organic-Framework-Supported Molecular Electrocatalysis for the Oxygen Reduction Reaction, *Angew Chem Int Edit*, 60 (2021) 8472-8476.
- [3] L.N. Ye, Y.Y. Fang, Z.P. Ou, S.L. Xue, K.M. Kadish, Cobalt Tetrabutano- and Tetrabenzotetraarylporphyrin Complexes: Effect of Substituents on the Electrochemical Properties and Catalytic Activity of Oxygen Reduction Reactions, *Inorg Chem*, 56 (2017) 13613-13626.
- [4] S.L. Xue, W.R. Osterloh, X.J. Lv, N.C. Liu, Y.M. Gao, H.T. Lei, Y.Y. Fang, Z.T. Sun, P.F. Mei, D. Kuzuhara, N. Aratani, H. Yamada, R. Cao, K.M. Kadish, F.X. Qiu, Enhanced Four-Electron Oxygen Reduction Selectivity of Clamp-Shaped Cobalt(II) Porphyrin(2.1.2.1) Complexes, *Angew Chem Int Edit*, (2023).
- [5] R. McGuire, D.K. Dogutan, T.S. Teets, J. Suntivich, Y. Shao-Horn, D.G. Nocera, Oxygen reduction reactivity of cobalt(II) haptophthalocyanine porphyrins, *Chem Sci*, 1 (2010) 411-414.
- [6] R. Yuan, Y. Wei, B. Musikavanhu, M. Tang, Z. Xue, A. Wang, J. Zhang, X. Qiu, L. Zhao, Asymmetric cobalt porphyrins for oxygen reduction reactions: Boosted catalytic activity by the use of triphenylamine, *Molecular Catalysis*, 534 (2023).
- [7] R. Zhang, J.J. Warren, Controlling the Oxygen Reduction Selectivity of Asymmetric Cobalt Porphyrins by Using Local Electrostatic Interactions, *J Am Chem Soc*, 142 (2020) 13426-13434.
- [8] L. Zhao, Q.X. Xu, Z.W. Shao, Y. Chen, Z.L. Xue, H.N. Li, J.M. Zhang, Enhanced Oxygen Reduction Reaction Performance Using Intermolecular Forces Coupled with More Exposed Molecular Orbitals of Triphenylamine in Coporphyrin Electrocatalysts, *Acs Appl Mater Inter*, 12 (2020) 45976-45986.
- [9] Q.X. Xu, L. Zhao, Y.H. Ma, R. Yuan, M.S. Liu, Z.L. Xue, H.N. Li, J.M. Zhang, X.P. Qiu, Substituents and the induced partial charge effects on cobalt porphyrins catalytic oxygen reduction reactions in acidic medium, *J Colloid Interf Sci*, 597 (2021) 269-277.
- [10] R. Yuan, Y.Q. Wei, Z.L. Xue, A.J. Wang, J.M. Zhang, H.J. Xu, L. Zhao, Effects of support material and electrolyte on a triphenylamine substituted cobalt porphyrin catalytic oxygen reduction reaction, *Colloid Surface A*, 665 (2023).
- [11] Y.Q. Wei, L. Zhao, R. Yuan, Z.L. Xue, J. Mack, C. Chiyumba, T. Nyokong, J.M. Zhang, Promotion of Catalytic Oxygen Reduction Reactions: The Utility of Proton Management Substituents on Cobalt Porphyrins, *Inorg Chem*, 61 (2022).
- [12] Q. Xu, L. Zhao, R. Yuan, Y. Chen, Z. Xue, J. Zhang, X. Qiu, J. Qu, Interfacial charge transfer mechanism of oxygen reduction reaction in alkali media: Effects of molecular charge states and triphenylamine substituent on cobalt porphyrin electrocatalysts, *Colloid Surface A*, 629 (2021).
